# Supplementary material for: The Antimicrobial Peptide 1018-K6 Interacts Distinctly with Eukaryotic and Bacterial Membranes, the Basis of Its Specificity and Bactericidal Activity
Source: MDPI journal article supplement (doi:10.3390/ijms232012392), 2022-10-16
Supplement: s1 [file s1]

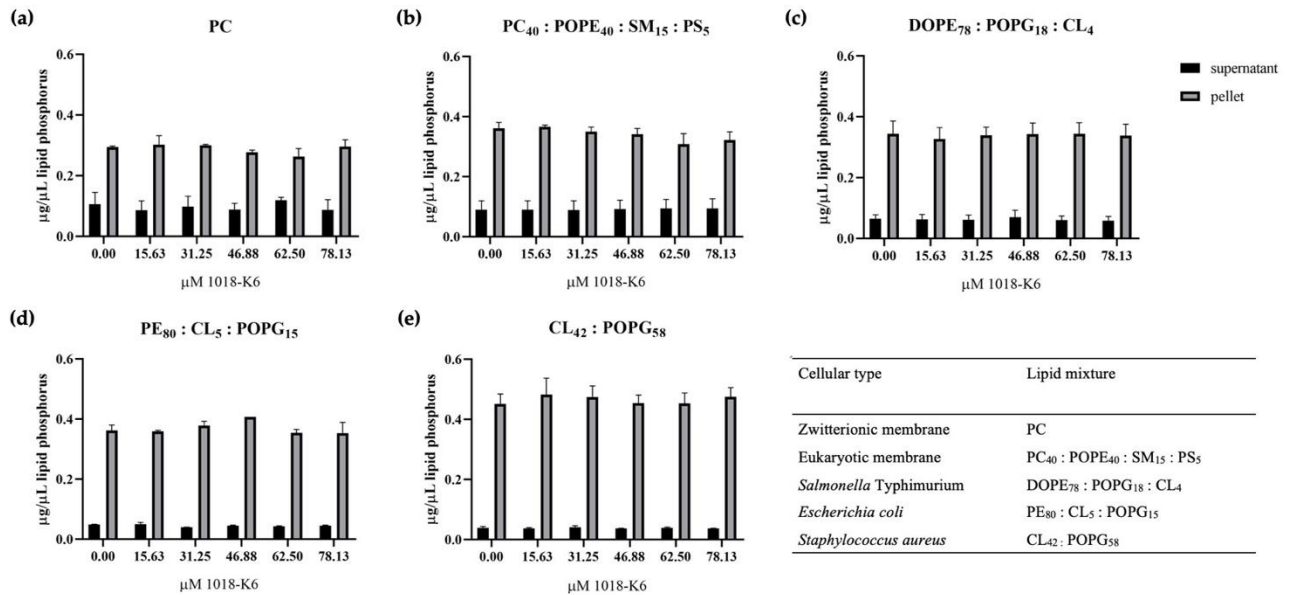

**Figure S1. Lipid phosphorus concentration in the supernatant and pellet for each multilamellar vesicle sample used to assess the binding to model membranes.** Evaluation of the lipid sedimentation following a 30 minute incubation with several concentrations of the 1018-K6 peptide. **(a)** Zwitterionic lipids (PC); **(b)** Eukaryotic cell (PC<sub>40</sub>:POPE<sub>40</sub>:SM<sub>15</sub>:PS<sub>5</sub>); **(c)** *S. Typhimurium* (DOPE<sub>78</sub>:POPG<sub>18</sub>:CL<sub>4</sub>); **(d)** *Escherichia coli* (PE<sub>80</sub>:CL<sub>5</sub>:POPG<sub>15</sub>); **(e)** *S. aureus* (CL<sub>42</sub>:POPG<sub>58</sub>). The results correspond to the mean  $\pm$  standard error (SE) of three independent experiments per model membrane.

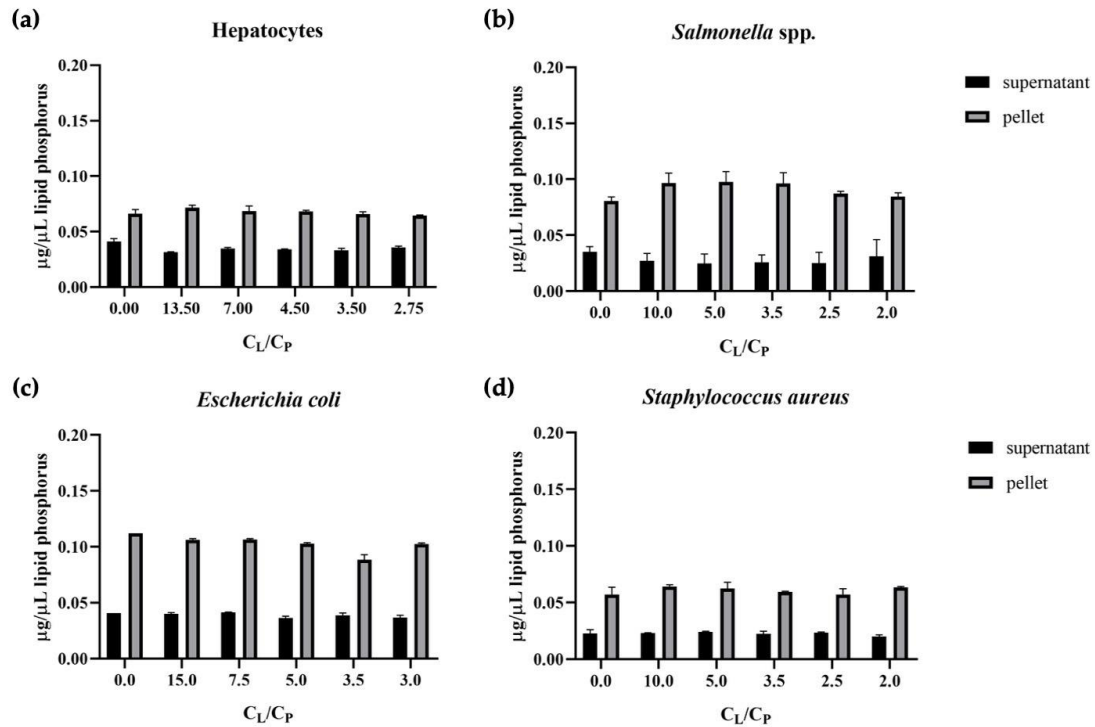

**Figure S2. Lipid phosphorus concentration in the supernatant and pellet for each multilamellar vesicle sample used to assess the binding to biological membranes.** Evaluation of the lipid sedi-

mentation following a 30 minute incubation with several concentrations of the 1018-K6 peptide. (a) Hepatocytes; (b) *Salmonella* spp.; (c) *E. coli*; (d) *S. aureus*. The results correspond to the mean  $\pm$  standard error (SE) of three independent experiments.

**Table S1.** Binding potential (BP) of AMP 1018-K6 towards multilamellar vesicles of model membranes.

| Cell type                      | Lipid mixture                                                              | BP           |                   |
|--------------------------------|----------------------------------------------------------------------------|--------------|-------------------|
|                                |                                                                            | Fluorescence | UV-Vis absorption |
| Zwitterionic membrane          | PC                                                                         | 4.29         | 2.02              |
| Eukaryotic membrane            | PC <sub>40</sub> : POPE <sub>40</sub> : SM <sub>15</sub> : PS <sub>5</sub> | 4.91         | 0.43              |
| <i>Salmonella</i> Typhimurium* | DOPE <sub>78</sub> : POPG <sub>18</sub> : CL <sub>4</sub>                  | 5.17         | 3.37              |
| <i>Escherichia coli</i>        | PE <sub>80</sub> : CL <sub>5</sub> : POPG <sub>15</sub>                    | 4.24         | 3.62              |
| <i>Staphylococcus aureus</i>   | CL <sub>42</sub> : POPG <sub>58</sub>                                      | 3.32         | 2.17              |

\*The results refer to the experiments carried out with a higher concentration of peptide.

**Table S2.** Binding potential (BP) of AMP 1018-K6 towards multilamellar vesicles of biological membranes.

| Biological membranes         | BP           |                   |
|------------------------------|--------------|-------------------|
|                              | Fluorescence | UV-Vis absorption |
| Hepatocytes                  | 7.22         | 18.61             |
| <i>Salmonella</i> spp.       | 26.87        | 18.78             |
| <i>Escherichia coli</i>      | 10.71        | 42.35             |
| <i>Staphylococcus aureus</i> | 31.05        | 23.42             |
